# Supplementary material for: Mechanical oscillation of dynamic microtubule rings
Source: Royal Society of Chemistry journal article supplement (doi:10.1039/c6ra16613j), 2016-01-01
Supplement: c6ra16613j7.pdf [file c6ra16613j7.pdf]

## Supplementary Information

### **Mechanical Oscillation of Dynamic Microtubule Rings**

*Masaki Ito<sup>a,\*</sup>, Arif Md. Rashedul Kabir<sup>b,\*</sup>, Md. Sirajul Islam<sup>a</sup>, Daisuke Inoue<sup>b</sup>,*

*Shoki Wada<sup>a</sup>, Kazuki Sada<sup>a,b</sup>, Akihiko Konagaya<sup>c</sup> and Akira Kakugo<sup>a,b,#</sup>*

<sup>a</sup>Graduate School of Chemical Sciences and Engineering, Hokkaido University, Sapporo,  
060-0810, Japan

<sup>b</sup>Faculty of Science, Hokkaido University, Sapporo, 060-0810, Japan

<sup>c</sup>Department of Computational Intelligence and Systems Science, Tokyo Institute of  
Technology, Yokohama, 226-8501, Japan

<sup>#</sup>Corresponding author

E-mail: kakugo@sci.hokudai.ac.jp

Telephone/FAX: +81-11-706-3474

\*These authors contributed equally to this work.

**(a) Preparation of partially hydrophobic glass substrate**

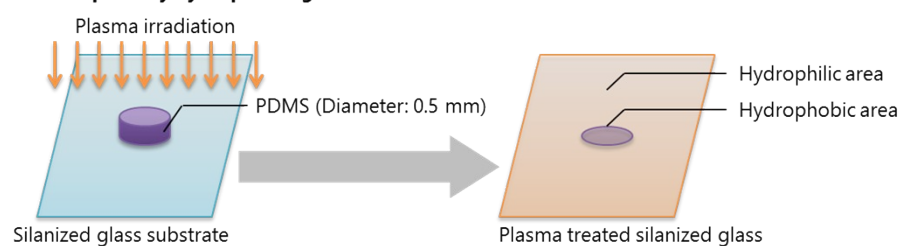

**(b) Flow cell preparation**

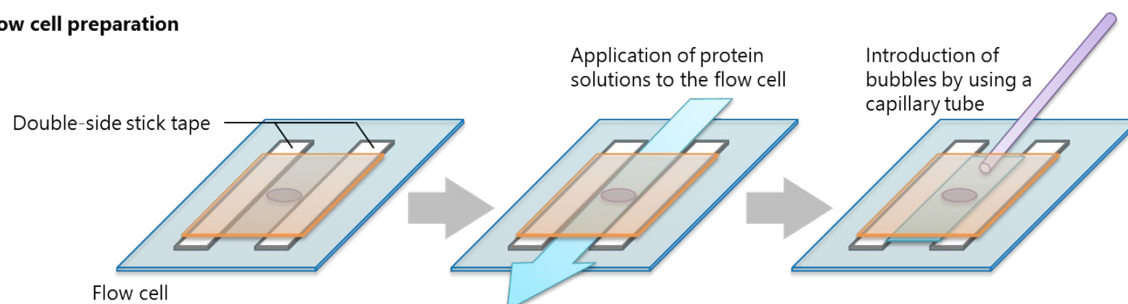

**(c) Cross-section of the flow cell**

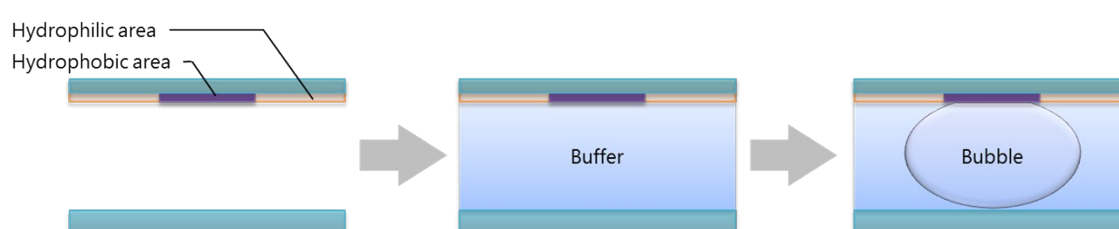

Figure S1: Schematic illustrations showing the preparation of hydrophobic glass substrate (a), preparation of flow cell (b), and cross-section of the flow cell and position of a bubble at the hydrophobic area inside the flow cell (c).

(a) A Tangent to the circle barely touches the circle at a single point.

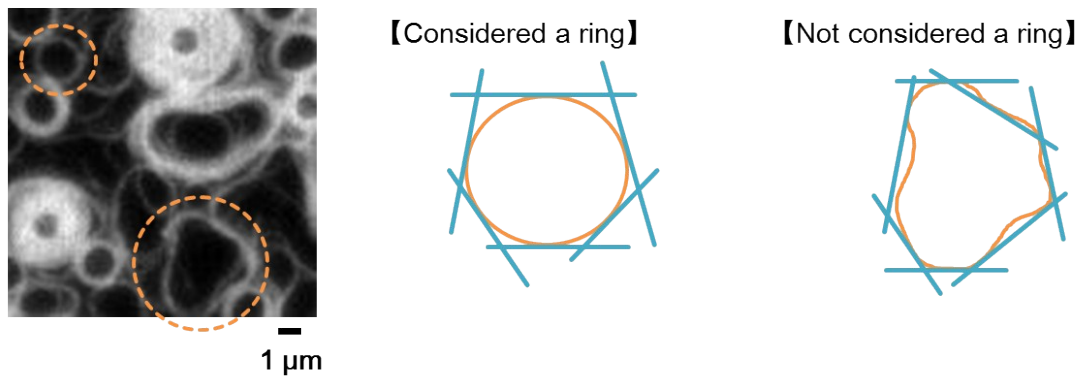

(b) The value of "Roundness" must be more than 0.75.

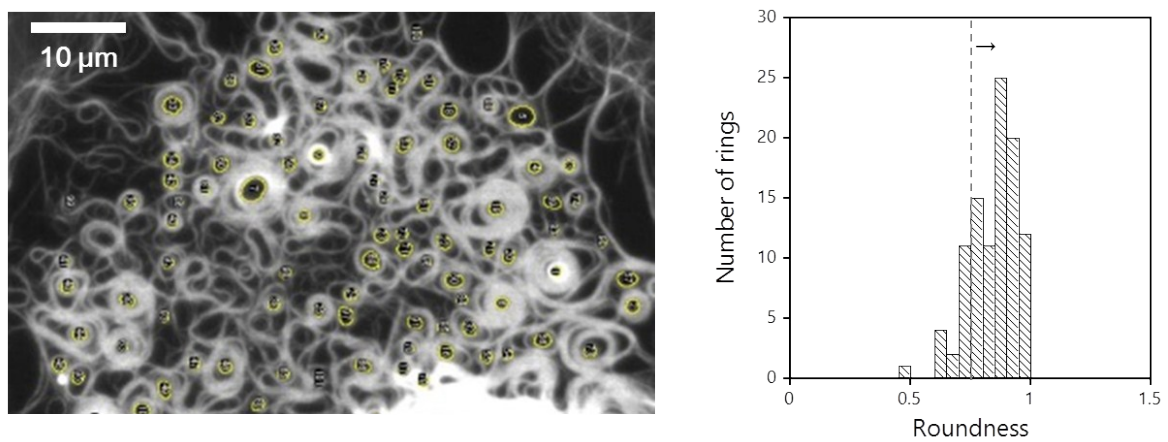

Figure S2: An assembly of MTs was considered a ring based on the two criteria mentioned in (a) and (b).

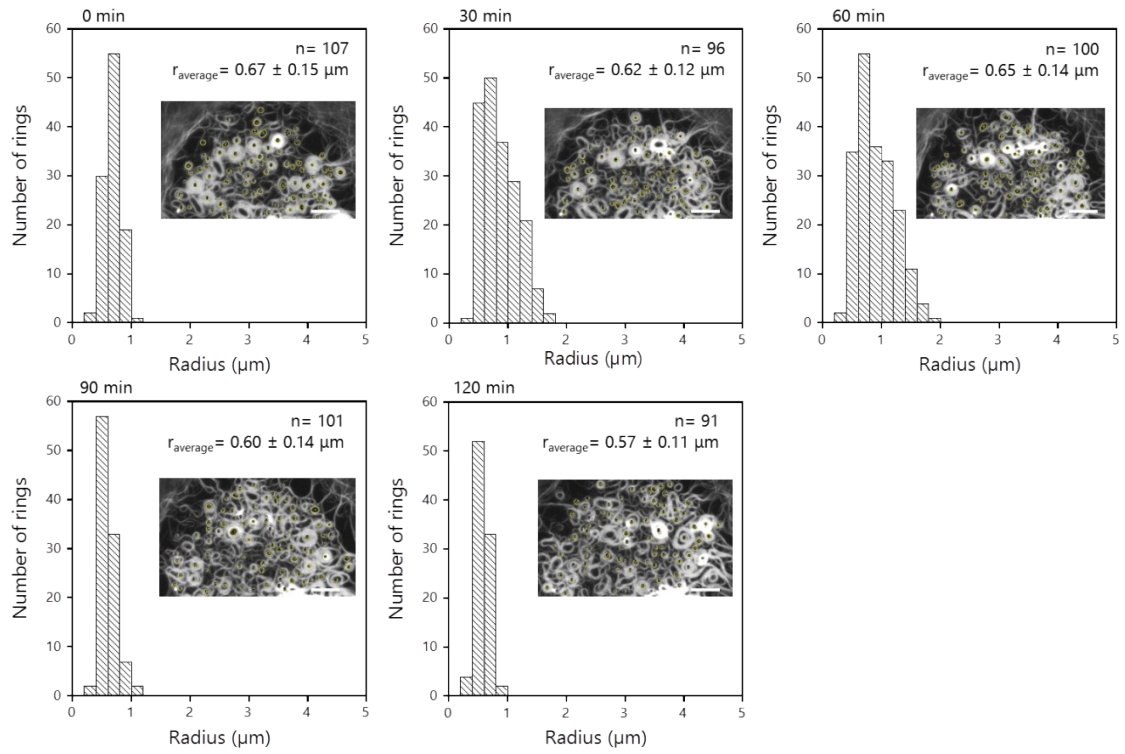

Figure S3: Histograms show the change in size of the MT rings with time. Insets show fluorescence microscopy images of the MT rings for the corresponding time; “n” represents the number of samples considered and, “ $r_{\text{average}}$ ” represents the average radius of the MT rings (average $\pm$ standard deviation). Scale bar: 10  $\mu\text{m}$ .

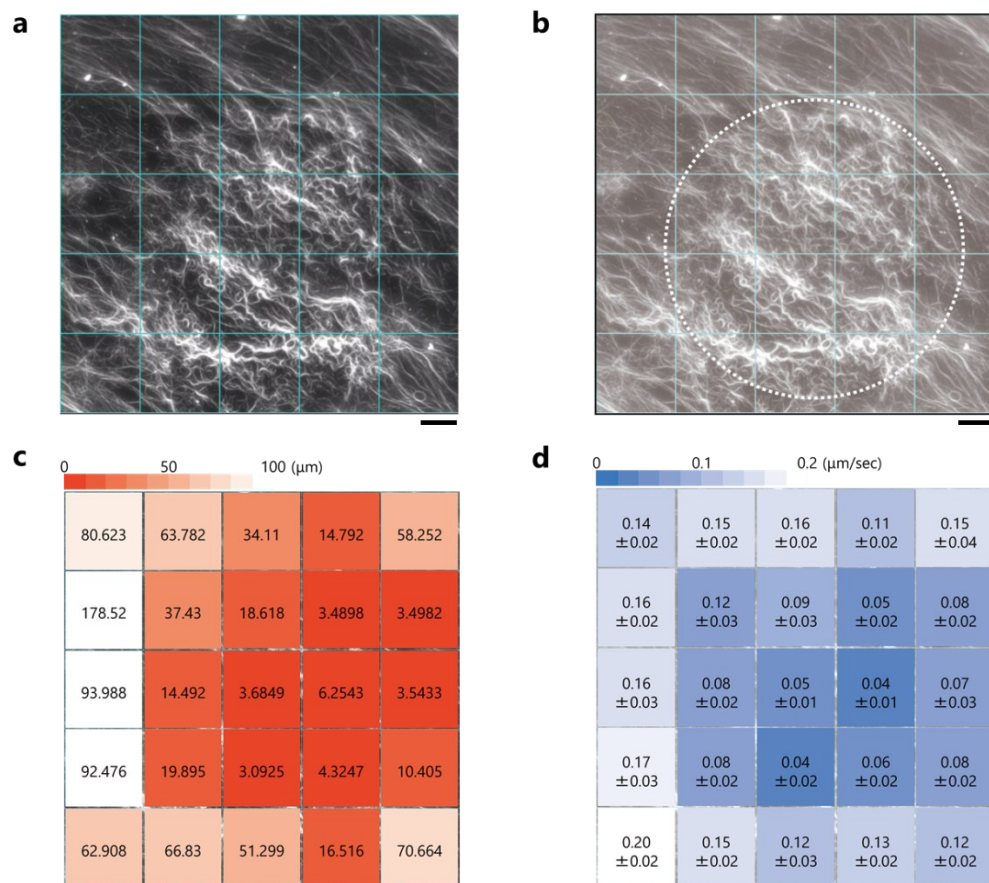

Figure S4: Fluorescence microscopy image of MTs beneath a small bubble whose height was not enough to induce formation of dynamic MT rings (a); position of the bubble is marked by white-dotted line (b); heat map of the persistent length (c) and velocity (d) of MTs at different area beneath the bubble. Scale bar: 10  $\mu\text{m}$ .

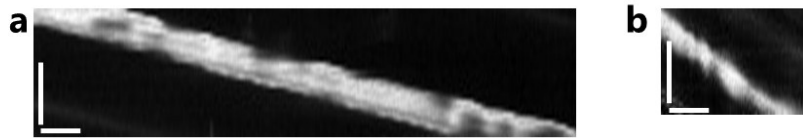

Figure S5: Kymographs of MTs at the outermost (a) and innermost (b) periphery of a MT ring prepared using the streptavidin-biotin interaction. In such a ring, MT filaments are tightly fixed to each other preventing the sliding of the filaments. Scale bar: 3 min (vertical) and 5  $\mu\text{m}$  (horizontal).

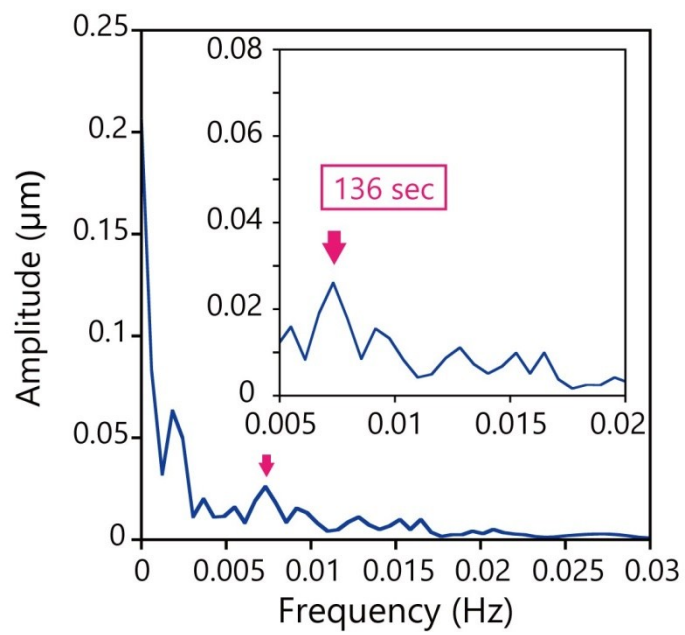

Figure S6: The power spectrum obtained from the Fast Fourier Transformation (FFT) analyses of the  $\Delta D$  for the oscillation event. A significant peak at 0.007325 Hz (pink arrow) is observed which corresponds to the period of  $\sim 136$  sec.
